# Supplementary material for: Effect of intellectual enrichment on AD biomarker trajectories: Longitudinal imaging study
Source: PubMed Central journal article supplement — Neurology. 2016 Mar 22;86(12):1128–35. doi: 10.1212/WNL.0000000000002490 (PMC4820132; doi:10.1212/wnl.0000000000002490), 2016-03-22
Supplement: supp_WNL.0000000000002490_Supplemental_data.pdf [file supp_WNL.0000000000002490_Supplemental_data.pdf]

### ***Power Analyses***

Since we generally did not find significant associations of cognitive reserve variables or sex with biomarker values, we wanted to ensure that we had adequate power in the study to detect any important associations. We used simulations to estimate minimum detectable effect sizes at  $\alpha=0.05$  for these variables given the sample size. Using sex and PiB changes over time as an example, holding the observed variability constant, we found the minimum detectable regression coefficient for  $\log(\text{PiB})$  over time to be 0.006. At 5 years of follow up, that corresponds to a minimum detectable difference between males and females of 0.03 for  $\log(\text{PiB})$ . If, say, we had males and females starting with PiB values of 1.5 at baseline, and the females stayed constant, we would have power to detect changes over time in the males leading to predicted PiB as small as 1.55 after 5 years. We could thus detect quite small differences between males and females over time. Using education/occupation and PiB changes over time as another example, we found the minimum detectable regression coefficient for  $\log(\text{PiB})$  over time to also be 0.006. If, say, we had groups with the mean education/occupation and education/occupation 1 standard deviation from the mean, both starting with PiB values of 1.5 at baseline, and the mean group stayed constant, we would have power to detect changes over time in the other group leading to predicted PiB as small as 1.55 after 5 years. The small magnitude of these detectable effects suggests that we had adequate power to detect associations of interest. Results for the other cognitive reserve variables and APOE were consistent with this conclusion.

We also used simulations to estimate minimum detectable effect sizes at  $\alpha=0.05$  for the high education and low education groups, looking at the APOE4 x Cognitive midlife interaction in amyloid deposition, and found that the minimum detectable effect sizes for the high and low education groups differed by only 0.003. Differences in power between the high and low education groups would thus seem to be very small.

**Table e-1:** Midlife cognitive activities (mean values) split by education level (Edu) and cognitive activity levels (CA).

| Variable            | High Edu &<br>High CA<br>n = 128 | High Edu &<br>Low CA<br>n = 77 | Low Edu &<br>High CA<br>n = 73 | Low Edu &<br>Low CA<br>n = 115 | P-value |
|---------------------|----------------------------------|--------------------------------|--------------------------------|--------------------------------|---------|
| Artistic activities | 0.5                              | 0.1                            | 0.4                            | 0.0                            | 0.005   |
| Computer activities | 3.9                              | 1.3                            | 3.2                            | 1.0                            | <0.0001 |
| Craft activities    | 1.3                              | 0.6                            | 2.6                            | 0.9                            | <0.0001 |
| Group activities    | 1.4                              | 0.6                            | 0.9                            | 0.4                            | <0.0001 |
| Play games          | 2.6                              | 0.7                            | 3.1                            | 1.4                            | <0.0001 |
| Play music          | 1.1                              | 0.5                            | 0.8                            | 0.2                            | 0.0002  |
| Read books          | 4.0                              | 1.0                            | 3.7                            | 0.6                            | <0.0001 |
| Read magazines      | 4.7                              | 2.2                            | 4.4                            | 2.3                            | <0.0001 |
| Read newspapers     | 6.6                              | 5.9                            | 6.6                            | 5.9                            | <0.0001 |
| Social activities   | 1.5                              | 1.0                            | 1.5                            | 0.9                            | 0.0002  |

The P-values come from an ANOVA testing for an overall difference among the groups  
Rating of scores for each of the cognitive activities - 0.0=once a month or less; 0.5=2-3 times a month; 1.5=1-2 times per week; 3.5=3-4 times per week; 5.5=5-6 times per week; 7.0=every day

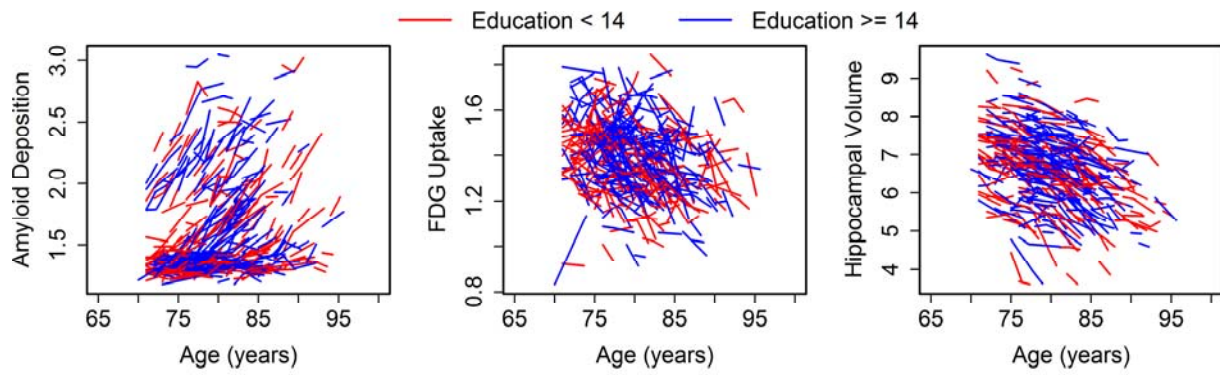

**Figure e-1:** Spaghetti plots of biomarker values in individual subjects lined up by age.

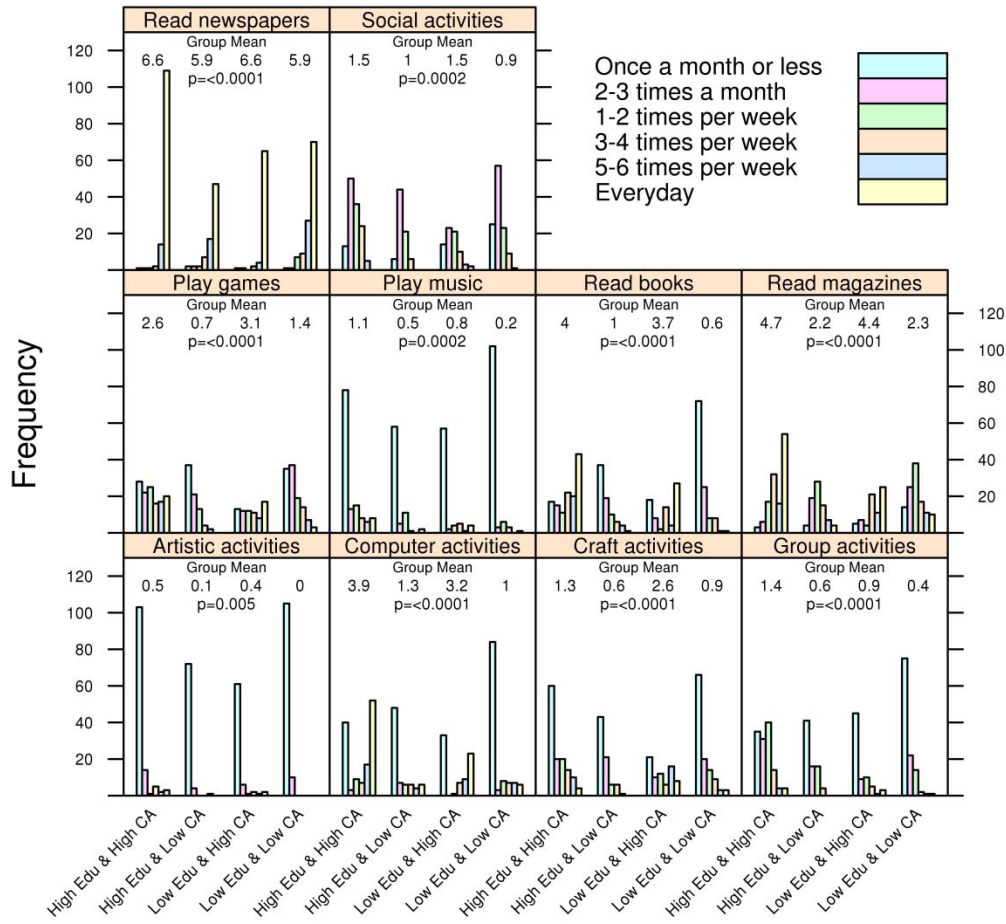

**Figure e-2:** Frequencies of each of the midlife cognitive activities displayed after stratification by education level (Edu) and cognitive activity levels (CA).

## MIDLIFE PHYSICAL ACTIVITY QUESTIONNAIRE

Patient #: \_\_\_\_\_

In the following questions, we are interested in your physical activities when you were **50 – 65 years old**.

| For each of the physical activities listed below, please indicate on average, how often you have performed the activity when you were <b>50 to 65 years old</b>                                                                 |                              |                          |                          |                             |                          |                          |
|---------------------------------------------------------------------------------------------------------------------------------------------------------------------------------------------------------------------------------|------------------------------|--------------------------|--------------------------|-----------------------------|--------------------------|--------------------------|
| <b>Physical activities when you were 50-65 years old</b>                                                                                                                                                                        | Once a month or never        | 2-3 times a month        | 1-2 times per week       | 3-4 times per week          | 5-6 times per week       | Every day                |
| <b>Light activities</b> like laundry, vacuuming, making beds, dusting, light yard-work, repairs, or home maintenance                                                                                                            | <input type="checkbox"/>     | <input type="checkbox"/> | <input type="checkbox"/> | <input type="checkbox"/>    | <input type="checkbox"/> | <input type="checkbox"/> |
| <b>Light exercise</b> like bowling, walking leisurely, stretching, golfing with a golf cart, slow dancing                                                                                                                       | <input type="checkbox"/>     | <input type="checkbox"/> | <input type="checkbox"/> | <input type="checkbox"/>    | <input type="checkbox"/> | <input type="checkbox"/> |
| <b>Moderate activities</b> like scrubbing floors, washing windows, shoveling or snow-blowing light snow, digging, gardening, moving boxes, furniture, or garbage cans, raking leaves, painting, carpentry                       | <input type="checkbox"/>     | <input type="checkbox"/> | <input type="checkbox"/> | <input type="checkbox"/>    | <input type="checkbox"/> | <input type="checkbox"/> |
| <b>Moderate exercise</b> like brisk walking, hiking, aerobics, strength training, golfing without a golf cart, swimming, tennis doubles, moderate use of exercise machines (exercise bike), yoga, martial arts, weight lifting. | <input type="checkbox"/>     | <input type="checkbox"/> | <input type="checkbox"/> | <input type="checkbox"/>    | <input type="checkbox"/> | <input type="checkbox"/> |
| <b>Heavy activities</b> like carrying heavy objects/masonry, farm work, heavy digging, pushing a mower, shoveling or snow-blowing moderate or heavy snow, hard manual labor                                                     | <input type="checkbox"/>     | <input type="checkbox"/> | <input type="checkbox"/> | <input type="checkbox"/>    | <input type="checkbox"/> | <input type="checkbox"/> |
| <b>Vigorous exercise</b> like jogging, backpacking, bicycling uphill, tennis singles, racquetball, intense/extended use of exercise machines, skiing                                                                            | <input type="checkbox"/>     | <input type="checkbox"/> | <input type="checkbox"/> | <input type="checkbox"/>    | <input type="checkbox"/> | <input type="checkbox"/> |
| When you were 50-65 years old, did you participate in any regular activity or program (either on your own or in a formal class) designed to obtain exercise or improve your physical fitness?                                   | <input type="checkbox"/> Yes |                          |                          | <input type="checkbox"/> No |                          |                          |

(Continued on next page)
